# Supplementary material for: Dynamic-Statistic Combined Ensemble Prediction and Impact Factors on China’s Summer Precipitation
Source: Copernicus journal article supplement (doi:10.5194/egusphere-2024-3762), 2024-12-10
Supplement: Supplementary file [file egusphere-2024-3762-RC1-supplement.pdf]

The Unequal-Weighted Ensemble prediction (UWE) based on the dynamic-statistic combined schemes is presented, and its possible impact factors are also analyzed in the paper. It is indicated that it's a meaningful method for improving summer precipitation in China. Uncertainty analysis also provides key information on common issues needed to be further discussed in the climate prediction area and provides quite meaningful results. I would like to suggest a moderate revision before this manuscript can be accepted for publication. My comments are listed as follows,

1. In the abstract, it is suggested to revise the sentence “the Unequal-Weighted Ensemble prediction (UWE) based on the dynamic-statistic combined schemes is presented,” as “the Unequal-Weighted Ensemble prediction (UWE) using outputs of the dynamic-statistic prediction is presented,” which makes it more concise and understandable. This change could be considered in the whole manuscript.

2. The title of part 1.5 “The ensemble for dynamic-statistic prediction” could be revised as “The Dynamic-Statistic Combined Ensemble Prediction”. Then the definition of “Dynamic-Statistic Combined Ensemble Prediction” needs to be briefly explained in this part.

3. In the figure 1, the explanation of climate indices needs to be addressed in the title of figure 1.

4. The meaning of  $w_k$  needs to be addressed.

5. The title of figure 3 “Scatter distribution of differences of (a) PS and (b) RACC values for UWE of summer precipitation in China during 2011 - 2020.”, suggest revising as “Scatter distribution of differences of (a) PS and (b) RACC for summer precipitation prediction during 2011 – 2020 between station-based and grid-based UWE.”

6. The dispersal intensity ( $Di$ ) is proposed authors or referenced from other studies need to addressed in the manuscript.

7. In figure 8, why there are four same color circles for each year. Further description needs to be added in the figure title.

8. discussion why the UWE prediction can further improve summer rainfall prediction in China needs to be addressed in the last part of the manuscript.
